# Supplementary material for: A New Species of Bryaxis (Coleoptera: Staphylinidae: Pselaphinae) from Mount Etna (Sicily, Italy) and Notes on Its Ecology and Distribution
Source: MDPI journal article supplement (doi:10.3390/ani13182941), 2023-09-16
Supplement: s1 [file s1]

**Table S1.** Body traits of *Bryaxis aetnensis* sp. nov. specimens collected on Mount Etna lava caves. Measures of holotype are taken as reference.

| Specimen                                                     | Long | Color                          | Eyes<br>omma | Head l/w    | Antenna l | Scape l/w | Pedicel l/w | Last palpomere l/w | Pronotum l/w | Elytra l/w | Protibiae                                 | Metatibiae                                | Aedeagus l |
|--------------------------------------------------------------|------|--------------------------------|--------------|-------------|-----------|-----------|-------------|--------------------|--------------|------------|-------------------------------------------|-------------------------------------------|------------|
| Holotype<br>Grotta dei Rotoli<br>[SICT1239]                  | 1.7  | Entirely testaceous<br>reddish | 4            | 0.275/0.29  | 0.68      | 0.12/0.06 | 0.062/0.05  | 0.285/0.085        | 0.35/0.35    | 0.58/0.63  | Slightly incised in<br>the distal quarter | Slightly incised in<br>the distal quarter | 0.26       |
| Paratype m<br>Grotta di Monte<br>Corruccio [SICT1056]        | 1.7  | Entirely reddish               | 3            | 0.275/0.285 | 0.67      | 0.11/0.05 | 0.062/0.045 | 0.285/0.085        | 0.33/0.34    | 0.58/0.625 | Slightly incised in<br>the distal quarter | Slightly incised in<br>the distal quarter | 0.26       |
| Paratype f<br>Grotta Lunga (di<br>Monpeloso) [SICT1029]      | 1.45 | Entirely testaceous<br>reddish | 3            | 0.265/0.275 | 0.62      | 0.11/0.05 | 0.06/0.045  | absent             | 0.32/0.34    | 0.56/0.60  | -                                         | -                                         | -          |
| Paratype f<br>Grotta del Santo (di San<br>Nicola) [SICT1032] | 1.6  | Entirely testaceous<br>reddish | 4            | 0.275/0.29  | 0.635     | 0.12/0.05 | 0.062/0.045 | 0.275/0.08         | 0.32/0.35    | 0.56/0.60  | -                                         | -                                         | -          |
| Paratype f<br>Grotta di Monte<br>Corruccio [SICT1056]        | 1.6  | Entirely testaceous<br>reddish | 4            | 0.275/0.29  | 0.64      | 0.11/0.05 | 0.06/0.045  | 0.3/0.085          | 0.34/0.33    | 0.55/0.60  | -                                         | -                                         | -          |
| Paratype f<br>Grotta del Santo (di San<br>Nicola) [SICT1032] | 1.55 | Entirely reddish               | 4            | 0.265/0.275 | 0.62      | 0.11/0.05 | 0.06/0.045  | 0.275/0.08         | 0.34/0.33    | 0.56/0.60  | -                                         | -                                         | -          |
| Paratype f<br>Grotta Lunga (di<br>Monpeloso) [SICT1029]      | 1.5  | Entirely testaceous<br>reddish | 3            | 0.265/0.275 | 0.62      | 0.11/0.05 | 0.06/0.045  | 0.275/0.08         | 0.34/0.33    | 0.56/0.60  | -                                         | -                                         | -          |
| Paratype f<br>Grotta di Monte Cicirello<br>[SICT1156]        | 1.65 | Entirely testaceous<br>reddish | 3            | 0.27/0.27   | 0.65      | 0.12/0.05 | 0.06/0.045  | 0.275/0.08         | 0.34/0.345   | 0.58/0.62  | -                                         | -                                         | -          |
| Paratype f<br>Grotta Forcato<br>[SICT1013]                   | 1.5  | Entirely testaceous<br>reddish | 3            | 0.26/0.27   | 0.62      | 0.12/0.05 | 0.06/0.045  | 0.275/0.085        | 0.34/0.34    | 0.58/0.61  | -                                         | -                                         | -          |
| Paratype f<br>Grotta del Porcospino<br>[SICT1033]            | 1.7  | Entirely testaceous<br>reddish | 3            | 0.26/0.27   | 0.62      | 0.12/0.05 | 0.06/0.045  | 0.28/0.085         | 0.35/0.35    | 0.58/0.62  | -                                         | -                                         | -          |
| Paratype f<br>Grotta del Porcospino<br>[SICT1033]            | 1.7  | Entirely testaceous<br>reddish | 3            | 0.26/0.27   | 0.62      | 0.12/0.05 | 0.06/0.045  | 0.285/0.085        | 0.34/0.34    | 0.57/0.62  | -                                         | -                                         | -          |
